# Supplementary material
Source: PubMed Central journal article supplement (PMC3469453)
Supplement: epi-7-1115-s01.pdf [file epi-7-1115-s01.pdf]

Supplemental Material to:

Camprubí C, Pladevall M, Grossmann M, Garrido N, Carme Pons M, Blanco J. Semen samples showing an increased rate of spermatozoa with imprinting errors have a negligible effect in the outcome of assisted reproduction techniques. *Epigenetics* 7(10);  
<http://dx.doi.org/10.4161/epi.21743>  
<http://www.landesbioscience.com/journals/epigenetics/article/21743/>

**Dataset 1:** Mean, standard deviation (SD) range in H19-ICR (values in %)

|              | <b>CpG*</b><br><b>1</b> | <b>CpG*</b><br><b>2</b> | <b>CpG</b><br><b>3</b> | <b>CpG</b><br><b>4</b> | <b>CpG</b><br><b>6</b> | <b>CpG*</b><br><b>7</b> | <b>CpG*</b><br><b>8</b> | <b>CpG*</b><br><b>9</b> | <b>CpG</b><br><b>10</b> | <b>CpG</b><br><b>11</b> | <b>CpG</b><br><b>12</b> | <b>CpG*</b><br><b>13</b> | <b>CpG*</b><br><b>14</b> |
|--------------|-------------------------|-------------------------|------------------------|------------------------|------------------------|-------------------------|-------------------------|-------------------------|-------------------------|-------------------------|-------------------------|--------------------------|--------------------------|
| <b>Mean</b>  | 91,17                   | 92,5                    | 88,7                   | 75,2                   | 85,57                  | 93,1                    | 91,73                   | 91,47                   | 83,4                    | 88,03                   | 84,47                   | 94,63                    | 90,43                    |
| <b>2SD</b>   | 4,88                    | 5,42                    | 4,62                   | 13,34                  | 3,4                    | 9,99                    | 5,78                    | 6,38                    | 8,72                    | 4,32                    | 10,64                   | 5,16                     | 5,76                     |
| <b>Range</b> | 86-96                   | 87-97                   | 84-93                  | 61-88                  | 82-88                  | 83-100                  | 85-97                   | 85-97                   | 74-92                   | 83-92                   | 73-95                   | 89-99                    | 84-96                    |

\* Equivalent CpG values

**Dataset 2:** Mean, standard deviation (SD) range in KvDMR (values in %)

|              | CpG<br>1 | CpG<br>2 | CpG<br>3 | CpG*<br>4 | CpG<br>5 | CpG*<br>6 | CpG*<br>7 | CpG*<br>8 | CpG*<br>9 | CpG*<br>10 | CpG*<br>11 | CpG*<br>12 | CpG*<br>13 | CpG<br>14 | CpG<br>15 | CpG<br>16 | CpG<br>17 | CpG<br>18 | CpG*<br>19 | CpG*<br>20 | CpG<br>21 |
|--------------|----------|----------|----------|-----------|----------|-----------|-----------|-----------|-----------|------------|------------|------------|------------|-----------|-----------|-----------|-----------|-----------|------------|------------|-----------|
| <b>Mean</b>  | 1,37     | 0,5      | 1,37     | 0,9       | 2,2      | 1,07      | 0,97      | 1         | 0,97      | 1,3        | 1,1        | 0,73       | 0,77       | 0,43      | 1,4       | 0,47      | 1,53      | 0,6       | 1,17       | 0,83       | 0,17      |
| <b>2SD</b>   | 1,34     | 1,46     | 1,22     | 0,96      | 0,96     | 1,28      | 0,82      | 0,90      | 0,98      | 0,94       | 0,96       | 1,56       | 1,36       | 1,36      | 1,34      | 0,57      | 1,26      | 1,12      | 1,06       | 1,3        | 0,92      |
| <b>Range</b> | 0-2      | 0-1      | 0-2      | 0-1       | 1-3      | 0-2       | 0-1       | 0-1       | 0-1       | 0-2        | 0-2        | 0-2        | 0-2        | 0-1       | 0-2       | 0-1       | 0-2       | 0-1       | 0-2        | 0-2        | 0-1       |

\* Equivalent CpG values

**Dataset 3:** Mean, standard deviation (SD) range in SNRPN-ICR (values in %)

|              | CpG<br>1 | CpG*<br>2 | CpG*<br>3 | CpG<br>4 | CpG*<br>5 | CpG*<br>6 | CpG*<br>7 | CpG*<br>8 | CpG*<br>9 | CpG*<br>10 | CpG*<br>11 | CpG*<br>13 | CpG*<br>14 | CpG*<br>15 | CpG*<br>16 | CpG*<br>17 | CpG*<br>18 | CpG*<br>19 | CpG<br>20 | CpG<br>21 |
|--------------|----------|-----------|-----------|----------|-----------|-----------|-----------|-----------|-----------|------------|------------|------------|------------|------------|------------|------------|------------|------------|-----------|-----------|
| <b>Mean</b>  | 1,87     | 1,37      | 1,33      | 0,43     | 0,53      | 1,50      | 0,53      | 0,80      | 1,17      | 1,33       | 1,07       | 1,40       | 0,73       | 1,00       | 0,83       | 1,13       | 1,37       | 0,83       | 0,47      | 1,60      |
| <b>2SD</b>   | 1,94     | 1,7       | 1,32      | 1,36     | 1,36      | 2,02      | 1,64      | 2,12      | 2,42      | 2,7        | 2,28       | 2,44       | 2,02       | 2,34       | 2,04       | 2,22       | 2,66       | 2,46       | 1,72      | 3,42      |
| <b>Range</b> | 0-3      | 0-3       | 0-2       | 0-1      | 0-1       | 0-3       | 0-2       | 0-2       | 0-3       | 0-4        | 0-3        | 0-3        | 0-2        | 0-3        | 0-2        | 0-3        | 0-4        | 0-3        | 0-2       | 0-5       |

\* Equivalent CpG values

**Dataset 4:** Mean, standard deviation (SD) range in GTL2-DMR (values in %)

|              | CpG<br>1 | CpG<br>2 | CpG<br>3 | CpG*<br>4 | CpG*<br>5 | CpG*<br>6 | CpG*<br>7 | CpG*<br>8 | CpG<br>9 | CpG*<br>10 | CpG*<br>11 | CpG*<br>12 | CpG*<br>13 | CpG<br>14 | CpG<br>15 | CpG<br>16 | CpG*<br>17 | CpG*<br>18 | CpG<br>19 | CpG<br>20 | CpG<br>21 |
|--------------|----------|----------|----------|-----------|-----------|-----------|-----------|-----------|----------|------------|------------|------------|------------|-----------|-----------|-----------|------------|------------|-----------|-----------|-----------|
| <b>Mean</b>  | 0,63     | 0,60     | 2,10     | 1,40      | 1,07      | 0,83      | 1,27      | 1,13      | 0,63     | 0,90       | 0,97       | 0,87       | 1,23       | 2,07      | 1,87      | 1,97      | 0,83       | 1,23       | 0,70      | 1,53      | 1,30      |
| <b>2SD</b>   | 1,22     | 1,00     | 1,22     | 1,62      | 1,56      | 1,18      | 1,38      | 1,56      | 1,12     | 0,80       | 0,36       | 0,86       | 1,14       | 0,5       | 0,7       | 0,82      | 0,76       | 1          | 0,94      | 1,02      | 1,06      |
| <b>Range</b> | 0-1      | 0-1      | 0-3      | 0-3       | 0-2       | 0-2       | 0-2       | 0-2       | 0-1      | 0-1        | 0-1        | 0-1        | 0-2        | 0-2       | 0-2       | 0-2       | 0-1        | 0-2        | 0-1       | 0-2       | 0-2       |

\* Equivalent CpG values

---

**Dataset 5:** Mean, standard deviation (SD) range in IG-DMR (values in %)

---

|              | <b>CpG* 1</b> | <b>CpG* 2</b> | <b>CpG 3</b> | <b>CpG 4</b> | <b>CpG 5</b> |
|--------------|---------------|---------------|--------------|--------------|--------------|
| <b>Mean</b>  | 90,57         | 92,33         | 62,27        | 83,23        | 66,37        |
| <b>2SD</b>   | 6,58          | 8,7           | 7,14         | 6,72         | 6,38         |
| <b>Range</b> | 97-83         | 100-83        | 69-55        | 89-76        | 72-59        |

---

\* Equivalent CpG values

---

**Dataset 6: ART outcome**

| Case | Mature oocytes | ART Treatment | Zygotes | Embryo quality <sup>1</sup> |   |   |   | Non-viable embryos | Transferred embryos | Gestation | Sacs | Heartbeat | Miscarriage | Birth               | Sex               | Weighth (mg) |
|------|----------------|---------------|---------|-----------------------------|---|---|---|--------------------|---------------------|-----------|------|-----------|-------------|---------------------|-------------------|--------------|
|      |                |               |         | A                           | B | C | D |                    |                     |           |      |           |             |                     |                   |              |
| 1    | 5              | ICSI          | 4       |                             | 1 | 1 | 1 | 1                  | BCD                 | Negative  |      |           |             |                     |                   |              |
| 2    | 11             | IVF           | 6       |                             |   |   |   |                    | CRYO                |           |      |           |             |                     |                   |              |
|      |                |               |         | 1                           | 1 |   | 1 | 1                  | ABD                 | Negative  |      |           |             |                     |                   |              |
| 3    | 15             | ICSI          | 9       |                             |   | 3 | 3 | 3                  | CC                  | Negative  |      |           |             |                     |                   |              |
|      | 13             |               | 9       |                             |   | 2 | 3 | 4                  | CDD                 | Negative  |      |           |             |                     |                   |              |
| 6    | 12             | IVF           | 12      | 1                           |   | 2 | 3 | 2                  | AD                  | Positive  | 1    | 1         | 1           | female              | 3550              |              |
| 9    | 15             | ICSI          | 11      | 3                           |   |   | 4 | 1                  | AA                  | Positive  | 2    | 2         | 2           | male<br>+<br>female | 2340<br>+<br>2130 |              |
| 10   | 2              | ICSI          | 2       |                             |   |   | 2 |                    | DD                  | Negative  |      |           |             |                     |                   |              |
|      | 4              | ICSI          | 2       |                             |   | 1 | 1 |                    | CD                  | Positive  | 2    | 2         | unknown     |                     |                   |              |
| 11   | 3              | ICSI          | 2       | 1                           |   |   | 1 |                    | AD                  | Negative  |      |           |             |                     |                   |              |
|      | 6              | ICSI          | 6       | 1                           |   | 1 | 2 | 2                  | AC                  | Negative  |      |           |             |                     |                   |              |
|      | 2              | ICSI          | 1       |                             |   |   | 1 |                    | D                   | Negative  |      |           |             |                     |                   |              |
|      | 9              | IVF/ICSI      | 6       |                             |   |   | 4 | 2                  | DDD                 | Negative  |      |           |             |                     |                   |              |
|      | 16             | ICSI          | 12      | 1                           |   | 3 | 2 | 2                  | AC                  | Positive  | 0    |           |             |                     |                   |              |
| 12   | 6              | ICSI          | 5       |                             |   |   | 2 | 3                  | DD                  | Positive  | 1    | 1         | 1           | male                | 3560              |              |
| 13   | 6              | ICSI          | 6       | 2                           |   | 2 | 2 |                    | AA                  | Positive  | 1    | 1         | unknown     |                     |                   |              |
| 15   | 12             | IVF           | 8       | 1                           | 1 |   | 1 | 2                  | AB                  | Negative  |      |           |             |                     |                   |              |
| 17   | 21             | ICSI          | 17      |                             |   |   |   |                    | CRYO                |           |      |           |             |                     |                   |              |
|      |                |               |         |                             | 1 | 1 |   | 2                  | BC                  | Positive  | 0    |           |             |                     |                   |              |
| 20   | 2              | ICSI          | 1       |                             |   |   | 1 |                    | D                   | Positive  | 1    | 1         | 1           | female              | 2800              |              |
|      | 1              | ICSI          | 1       |                             |   |   | 1 |                    | D                   | Negative  |      |           |             |                     |                   |              |
|      | 17             | ICSI          | 13      | 1                           | 2 | 1 | 1 | 3                  | AB                  | Positive  | 2    | 2         | unknown     |                     |                   |              |
| 24   | 17             | ICSI          | 17      | 1                           | 3 |   | 1 | 3                  | AB                  | Positive  | 1    | 1         | 1           | male                | 3390              |              |
| 25   | 11             | ICSI          | 6       | 1                           |   |   | 2 | 3                  | AD                  | Positive  | 2    | 2         | 1           | unknown<br>(1Sac)   |                   |              |

|    |    |          |    |   |   |   |   |   |      |          |   |   |   |         |                     |                   |
|----|----|----------|----|---|---|---|---|---|------|----------|---|---|---|---------|---------------------|-------------------|
| 26 | 5  | ICSI     | 2  |   |   | 1 |   | 1 | C    | Negative |   |   |   |         |                     |                   |
|    | 5  | ICSI     | 5  |   |   | 2 | 1 | 2 | CD   | Negative |   |   |   |         |                     |                   |
| 27 | 7  | IVF      | 5  | 2 | 2 |   |   | 1 | AA   | Negative |   |   |   |         |                     |                   |
|    | 13 | IVF      | 11 | 3 |   | 2 | 1 | 2 | AA   | Positive | 1 | 1 |   | 1       | male                | unknown           |
|    | 7  | IVF      | 6  |   | 2 | 1 | 1 | 2 | BB   | Negative |   |   |   |         |                     |                   |
| 28 | 7  | ICSI     | 5  | 3 |   | 1 | 1 |   | A    | Positive | 1 | 1 |   | 1       | male                | 3120              |
| 30 | 8  | ICSI     | 7  |   |   |   | 1 |   | D    | Positive | 1 | 1 |   | 1       | male                | 2900              |
| 31 | 10 | ICSI     | 7  | 1 |   | 1 | 5 |   | AD   | Positive | 2 | 2 | 2 |         |                     |                   |
| 32 | 12 | IVF      | 7  | 1 | 3 |   | 1 | 2 | AB   | Negative |   |   |   |         |                     |                   |
| 33 | 13 | ICSI     | 8  |   |   | 2 | 3 | 3 | CC   | Negative |   |   |   |         |                     |                   |
| 34 | 6  | ICSI     | 3  | 1 |   |   | 1 | 1 | AD   | Positive | 1 | 1 | 1 |         |                     |                   |
|    | 4  | ICSI     | 1  | 1 |   |   |   |   | AD   | Negative |   |   |   |         |                     |                   |
| 36 | 8  | ICSI     | 6  |   | 1 | 4 |   | 1 | BC   | Positive | 1 | 1 |   | 1       | female              | unknown           |
| 37 | 9  | ICSI     | 7  |   | 2 |   | 2 | 3 | BB   | Positive | 1 | 1 |   | 1       | female              | 3150              |
| 40 | 8  | ICSI     | 4  |   |   |   | 3 | 1 | DDD  | Positive | 1 | 1 |   | unknown |                     |                   |
| 41 | 15 | IVF/ICSI | 10 |   |   |   | 5 | 1 | DD   | Negative |   |   |   |         |                     |                   |
|    |    |          |    |   |   |   | 4 |   | DD   | Positive | 1 | 1 |   | 1       | female              | 2900              |
| 42 | 8  | ICSI     | 5  | 2 |   | 1 | 1 | 1 | AA   | Positive | 2 | 2 |   | 2       | male<br>+<br>female | 1350<br>+<br>1550 |
| 43 | 2  | ICSI     | 2  |   |   |   | 1 | 1 | D    | Negative |   |   |   |         |                     |                   |
|    | 3  | ICSI     | 3  | 1 |   |   | 1 | 1 | AD   | Positive | 2 | 2 |   | unknown |                     |                   |
| 44 | 5  | ICSI     | 2  |   | 1 |   | 1 |   | BD   | Negative |   |   |   |         |                     |                   |
|    | 2  | ICSI     | 1  | 1 |   |   |   |   | A    | Negative |   |   |   |         |                     |                   |
|    | 3  | ICSI     | 1  | 1 |   |   |   |   | A    | Negative |   |   |   |         |                     |                   |
|    | 11 | ICSI     | 10 | 1 | 2 | 1 | 1 | 2 | AB   | Positive | 2 | 2 |   | unknown |                     |                   |
| 45 | 9  | IVF/ICSI | 6  |   |   |   |   |   | CRYO |          |   |   |   |         |                     |                   |
|    |    |          |    | 1 |   | 1 |   | 1 | AC   | Negative |   |   |   |         |                     |                   |
|    |    |          |    |   |   |   | 1 | 2 | D    | Negative |   |   |   |         |                     |                   |
|    | 16 | IVF      | 10 | 2 |   | 1 | 1 | 3 | AA   | Negative |   |   |   |         |                     |                   |
|    | 12 | IVF/ICSI | 12 | 2 | 1 | 2 | 2 | 1 | AA   | Negative |   |   |   |         |                     |                   |

|    |    |          |    |   |   |   |   |   |      |          |    |   |  |         |                     |                   |
|----|----|----------|----|---|---|---|---|---|------|----------|----|---|--|---------|---------------------|-------------------|
| 46 | 5  | ICSI     | 4  |   |   | 2 | 2 |   | CC   | Negative |    |   |  |         |                     |                   |
| 47 | 18 | IVF/ICSI | 10 | 1 | 1 | 1 | 2 | 1 | AB   | Positive | 2  | 2 |  | 2       | male<br>+<br>female | unknown           |
| 48 | 2  | ICSI     | 2  | 1 |   |   | 1 |   | AD   | Positive | 2  | 2 |  | 2       | male<br>+<br>female | 2630<br>+<br>2300 |
| 49 | 8  | ICSI     | 6  | 1 | 1 | 1 | 2 | 1 | AB   | Negative |    |   |  |         |                     |                   |
| 50 | 9  | ICSI     | 4  | 1 |   | 1 |   | 2 | AC   | Negative |    |   |  |         |                     |                   |
|    | 7  | ICSI     | 4  | 1 |   | 1 | 1 | 1 | AC   | Negative |    |   |  |         |                     |                   |
| 51 | 16 | IVF/ICSI | 11 |   |   |   |   |   | CRYO |          |    |   |  |         |                     |                   |
|    |    |          |    |   |   | 1 | 2 | 1 | CDD  | Negative |    |   |  |         |                     |                   |
|    |    |          |    | 1 | 1 |   | 1 | 1 | ABD  | Positive | 0  |   |  |         |                     |                   |
| 53 | 7  | ICSI     | 7  | 2 |   |   | 2 | 3 | AA   | Positive | 1  | 1 |  | 1       | female              | 3320              |
| 54 | 10 | IVF      | 6  |   |   |   |   |   | CRYO |          |    |   |  |         |                     |                   |
|    |    |          |    |   |   | 1 | 2 |   | CDD  | Positive | 1  | 1 |  | 1       | unknown             |                   |
|    |    |          |    |   |   | 2 | 1 | 1 | CCD  | ?        |    |   |  |         |                     |                   |
| 55 | 8  | IVF      | 7  | 1 |   |   | 3 | 3 | AD   | Negative |    |   |  |         |                     |                   |
|    | 11 | IVF      | 9  | 2 |   |   | 3 | 4 | AA   | Positive | 0  |   |  |         |                     |                   |
|    | 8  | IVF      | 6  | 1 |   |   |   |   | A    | Positive | 1  | 1 |  | 1       | female              | 3160              |
|    | 14 | IVF      | 12 |   | 2 |   |   |   | BB   | Positive | 1  | 1 |  | unknown |                     |                   |
| 57 | 10 | ICSI     | 6  | 4 |   | 2 |   |   | AC   | Positive | No |   |  |         |                     |                   |
|    | 2  | ICSI     | 2  |   |   | 1 | 1 |   | CD   | Negative |    |   |  |         |                     |                   |
| 58 | 4  | ICSI     | 0  |   |   |   |   |   |      |          |    |   |  |         |                     |                   |
|    | 2  | ICSI     | 1  | 1 |   |   |   |   | A    | Positive | 1  | 1 |  | 1       | male                | 2500              |
| 59 | 21 | IVF/ICSI | 19 |   |   |   |   |   | CRYO |          |    |   |  |         |                     |                   |
|    |    |          |    |   |   |   | 3 | 1 | DDD  | Negative |    |   |  |         |                     |                   |
|    |    |          |    |   |   | 1 | 2 | 1 | CDD  | Negative |    |   |  |         |                     |                   |
| 60 | 18 | ICSI     | 12 |   |   |   |   |   | CRYO |          |    |   |  |         |                     |                   |
|    |    |          |    |   | 1 |   | 3 |   | BDD  | Positive | 0  |   |  |         |                     |                   |
|    |    |          |    |   |   |   | 3 | 1 | DDD  | Positive | 1  | 1 |  |         |                     |                   |



|    |    |          |    |   |   |   |   |   |      |          |   |   |   |         |             |             |
|----|----|----------|----|---|---|---|---|---|------|----------|---|---|---|---------|-------------|-------------|
| 62 | 1  | ICSI     | 1  |   |   |   | 1 |   | D    | Negative |   |   |   |         |             |             |
| 63 | 9  | IVF      | 7  | 4 | 2 |   | D |   | AA   | Negative |   |   |   |         |             |             |
|    | 10 | IVF/ICSI | 9  | 2 |   |   |   |   | AA   | Negative |   |   |   |         |             |             |
|    | 7  | ICSI     | 6  |   |   |   |   |   |      |          |   |   |   |         |             |             |
| 64 | 4  | ICSI     | 3  |   |   |   | 1 | 2 | D    | Negative |   |   |   |         |             |             |
| 66 | 1  | ICSI     | 1  | 1 |   |   |   |   | A    | Negative |   |   |   |         |             |             |
| 67 | 12 | IVF      | 9  |   |   |   |   |   | CRYO |          |   |   |   |         |             |             |
|    |    |          |    |   | 1 | 1 | 3 |   | BCD  | Positive | 2 | 2 | 2 |         |             |             |
|    |    |          |    | 1 | 1 |   | 1 | 1 | AB   | Negative |   |   |   |         |             |             |
|    |    |          |    |   | 1 |   | 1 | 1 | BD   | Positive | 1 | 1 |   |         |             |             |
| 68 | 8  | ICSI     | 6  | 2 |   | 1 | 1 | 2 | AA   | Negative |   |   |   |         |             |             |
|    | 8  | ICSI     | 4  | 1 | 1 |   |   |   | AB   | Negative |   |   |   |         |             |             |
|    | 8  | ICSI     | 4  | 1 | 1 |   |   |   | AB   | Negative |   |   |   |         |             |             |
|    | 8  | ICSI     | 5  |   | 2 |   |   |   | BB   | Positive | 2 | 2 |   | 2       | male + male | 2060 + 2200 |
| 69 | 16 | ICSI     | 15 | 3 |   | 1 | 2 | 1 | AA   | Negative |   |   |   |         |             |             |
| 70 | 1  | ICSI     | 1  |   |   |   | 1 |   | D    | Negative |   |   |   |         |             |             |
|    | 15 | ICSI     | 13 | 2 | 1 | 2 | 2 |   | AA   | Positive | 1 | 1 |   | 1       | female      | 1200        |
| 72 | 13 | ICSI     | 11 |   |   |   |   |   | CRYO |          |   |   |   |         |             |             |
|    |    |          |    |   | 1 | 1 | 1 | 1 | BCD  | Positive | 1 | 1 |   |         |             |             |
| 73 | 5  | ICSI     | 3  |   | 1 | 1 | 1 |   | BC   | Positive | 1 | 1 |   | 1       | female      | 3540        |
| 74 | 14 | IVF      | 12 | 1 |   | 2 | 1 | 4 | AC   | Positive | 1 | 1 |   | 1       | female      | 3300        |
| 77 | 8  | ICSI     | 7  |   | 1 | 1 | 3 | 2 | BC   | Negative |   |   |   |         |             |             |
| 78 | 2  | ICSI     | 2  | 1 |   |   | 1 |   | AD   | Positive | 1 | 1 |   | 1       | female      | 3370        |
| 79 | 9  | IVF      | 8  | 1 | 3 | 2 | 2 |   | BB   | Positive | 1 | 1 |   | unknown |             |             |
| 80 | 3  | ICSI     | 2  |   |   |   | 1 | 1 | D    | Negative |   |   |   |         |             |             |
|    | 14 | ICSI     | 13 | 3 |   | 1 | 3 | 2 | AA   | Positive | 1 | 1 |   | 1       | female      | 2280        |
| 82 | 5  | ICSI     | 2  |   |   |   | 2 |   | DD   | Negative |   |   |   |         |             |             |
| 83 | 8  | ICSI     | 6  |   |   |   |   |   | CRYO |          |   |   |   |         |             |             |
|    |    |          |    |   |   |   | 2 | 1 | DD   | Negative |   |   |   |         |             |             |
|    | 4  | ICSI     | 3  |   |   |   | 2 | 1 | DD   | Negative |   |   |   |         |             |             |

|     |    |          |    |   |   |   |   |   |      |          |   |   |  |   |        |      |
|-----|----|----------|----|---|---|---|---|---|------|----------|---|---|--|---|--------|------|
| 84  | 6  | ICSI     | 3  |   |   |   | 2 | 1 | DD   | Negative |   |   |  |   |        |      |
|     | 2  | ICSI     | 2  |   |   |   | 2 |   | DD   | Negative |   |   |  |   |        |      |
|     | 5  | IVF      | 4  |   |   |   | 3 | 1 | DDD  | Negative |   |   |  |   |        |      |
| 85  | 14 | IVF      | 13 | 1 |   |   | 1 |   | AD   | Negative |   |   |  |   |        |      |
|     |    |          |    | 1 |   | 1 |   | 1 | AC   | Positive | 1 | 1 |  | 1 | male   | 3980 |
| 87  | 7  | ICSI     | 3  |   |   |   |   |   | CRYO |          |   |   |  |   |        |      |
| 89  | 3  | ICSI     | 2  |   |   |   | 2 |   | DD   | Positive | 0 |   |  |   |        |      |
| 90  | 4  | ICSI     | 3  |   | 1 | 1 |   | 1 | BC   | Positive | 0 |   |  |   |        |      |
| 91  | 3  | ICSI     | 3  |   |   |   | 2 | 1 | DD   | Negative |   |   |  |   |        |      |
|     | 4  | ICSI     | 4  |   |   |   | 1 |   | D    | Negative |   |   |  |   |        |      |
|     | 9  | ICSI     | 4  | 2 |   |   | 2 |   | AA   | Negative |   |   |  |   |        |      |
|     | 5  | ICSI     | 3  | 1 | 1 |   |   | 1 | AB   | Negative |   |   |  |   |        |      |
| 93  | 7  | ICSI     | 2  |   |   |   | 2 |   | DD   | Negative |   |   |  |   |        |      |
|     | 3  | ICSI     | 2  |   |   |   | 2 |   | DD   | Negative |   |   |  |   |        |      |
|     | 6  | ICSI     | 5  |   |   |   | 5 |   | DDD  | Negative |   |   |  |   |        |      |
| 95  | 10 | IVF/ICSI | 5  | 1 |   |   | 2 | 2 | AD   | Negative |   |   |  |   |        |      |
|     | 7  | ICSI     | 5  |   | 2 | 1 |   | 2 | BB   | Positive | 1 | 1 |  | 1 | female | 3000 |
| 97  | 11 | ICSI     | 0  |   |   |   |   |   |      |          |   |   |  |   |        |      |
|     | 14 | ICSI     | 8  | 1 | 1 | 1 | 3 | 2 | AB   | Positive | 1 | 1 |  | 1 | female | 2800 |
| 98  | 8  | ICSI     | 7  |   |   |   | 1 |   | D    | Positive | 1 | 1 |  | 1 | female | 3150 |
| 99  | 13 | IVF/ICSI | 10 |   |   |   |   |   | CRYO |          |   |   |  |   |        |      |
|     |    |          |    | 1 |   |   | 1 | 2 | AD   | Negative |   |   |  |   |        |      |
|     |    |          |    | 1 | 1 |   | 2 | 1 | ABD  | Negative |   |   |  |   |        |      |
| 101 | 1  | ICSI     | 1  |   |   |   | 1 |   | D    | Negative |   |   |  |   |        |      |
|     | 6  | ICSI     | 3  |   | 1 |   | 1 | 1 | BD   | Negative |   |   |  |   |        |      |
|     | 13 | ICSI     | 9  | 1 | 3 | 2 | 1 | 2 | AB   | Negative |   |   |  |   |        |      |
| 105 | 4  | ICSI     | 4  | 1 | 1 | 2 |   |   | AB   | Negative |   |   |  |   |        |      |
| 106 | 2  | ICSI     | 2  |   |   |   | 2 |   | DD   | Negative |   |   |  |   |        |      |

1. Based on the following paper: Ardoy M, Calderón G. Cuadernos de Embriología Clínica: Criterios de Valoración Morfológica de Oocitos, Embriones tempranos y Blastocistos Humanos. 2nd edn, 2008. ASEBIR, Madrid, Spain (included in the reference list).
